# Supplementary material for: Gemcitabine-Containing Chemotherapy for the Treatment of Metastatic Myxofibrosarcoma Refractory to Doxorubicin: A Case Series
Source: PubMed Central journal article supplement (PMC7985763; doi:10.3390/curroncol28010078), 2021-02-05
Supplement: curroncol-28-00078-s001.pdf [file curroncol-28-00078-s001.pdf]

Brief Report

# Gemcitabine-Containing Chemotherapy for the Treatment of Metastatic Myxofibrosarcoma Refractory to Doxorubicin: A Case Series

Arielle Elkrief, Suzanne Kazandjian and Thierry Alcindor

Supplementary Materials:

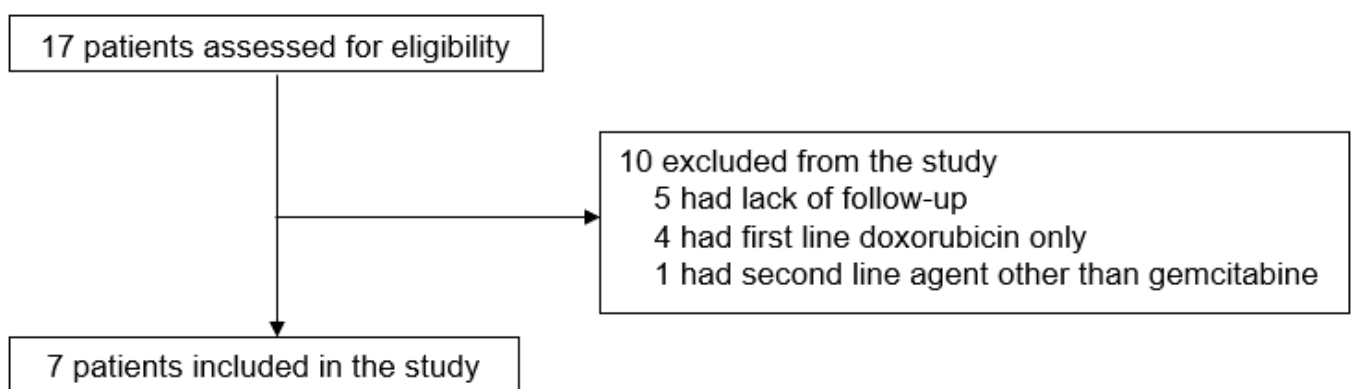

Figure S1. Consort diagram for study inclusion.
